# Supplementary material for: Multilocation Evaluation of Virginia and Runner -Type Peanut Cultivars for Yield and Grade in Virginia–Carolina Region
Source: MDPI journal article supplement (doi:10.3390/agronomy12123206), 2022-12-16
Supplement: s1 [file s1]

**Table S1:** Raw data for yield , SMK, ELK, SS, SMK and TK of 5 virginia and runner peanut cultivars tested across 13 environments.

| Year | Location  | Regime | Environment | Cultivar     | Rep | Market_Type | Yield (Kg/ha) | ELK (%) | SS (%) | SMK (%) | TK (%) |
|------|-----------|--------|-------------|--------------|-----|-------------|---------------|---------|--------|---------|--------|
| 2016 | Dinwiddie | RF+IR  | Dwd16RfIR   | Bailey       | 1   | Virginia    | 5199          | 39.8    | 3.7    | 64      | 70.9   |
| 2016 | Dinwiddie | RF+IR  | Dwd16RfIR   | Bailey       | 2   | Virginia    | 5696          | 38.5    | 3.1    | 65.3    | 71.9   |
| 2016 | Dinwiddie | RF+IR  | Dwd16RfIR   | Bailey       | 3   | Virginia    | 6207          | 40.1    | 3.5    | 62.2    | 69.8   |
| 2016 | Dinwiddie | RF+IR  | Dwd16RfIR   | Bailey       | 4   | Virginia    | 5967          | 44.2    | 2.7    | 67.1    | 72.4   |
| 2016 | Dinwiddie | RF     | Dwd16Rf     | Bailey       | 1   | Virginia    | 4366          | 34      | 2.4    | 57      | 65.8   |
| 2016 | Dinwiddie | RF     | Dwd16Rf     | Bailey       | 2   | Virginia    | 4808          | 40.5    | 3      | 57.3    | 66.4   |
| 2016 | Dinwiddie | RF     | Dwd16Rf     | Bailey       | 3   | Virginia    | 4143          | 36.9    | 3.3    | 50.1    | 63.1   |
| 2016 | Dinwiddie | RF     | Dwd16Rf     | Bailey       | 4   | Virginia    | 4798          | 38      | 5.8    | 52.9    | 65.4   |
| 2016 | Dinwiddie | RF+IR  | Dwd16RfIR   | FloRun107    | 1   | Runner      | 6251          | .       | 2.3    | 68      | 74.9   |
| 2016 | Dinwiddie | RF+IR  | Dwd16RfIR   | FloRun107    | 2   | Runner      | 6872          | .       | 1.9    | 66.9    | 73.9   |
| 2016 | Dinwiddie | RF+IR  | Dwd16RfIR   | FloRun107    | 3   | Runner      | 6171          | .       | 4.3    | 67.4    | 75.5   |
| 2016 | Dinwiddie | RF+IR  | Dwd16RfIR   | FloRun107    | 4   | Runner      | 6476          | .       | 6      | 67.2    | 77     |
| 2016 | Dinwiddie | RF     | Dwd16Rf     | FloRun107    | 1   | Runner      | 4374          | .       | 7.9    | 55.3    | 69.7   |
| 2016 | Dinwiddie | RF     | Dwd16Rf     | FloRun107    | 2   | Runner      | 4543          | .       | 4.2    | 58.6    | 70.3   |
| 2016 | Dinwiddie | RF     | Dwd16Rf     | FloRun107    | 3   | Runner      | 4767          | .       | 2.9    | 67.1    | 74.1   |
| 2016 | Dinwiddie | RF     | Dwd16Rf     | FloRun107    | 4   | Runner      | 5360          | .       | 3.3    | 54.7    | 67     |
| 2016 | Dinwiddie | RF+IR  | Dwd16RfIR   | Sullivan     | 1   | Virginia    | 5556          | 44.1    | 3.9    | 62.7    | 70.2   |
| 2016 | Dinwiddie | RF+IR  | Dwd16RfIR   | Sullivan     | 2   | Virginia    | 5782          | 41.6    | 2.9    | 59.9    | 69.4   |
| 2016 | Dinwiddie | RF+IR  | Dwd16RfIR   | Sullivan     | 3   | Virginia    | 5648          | 46.2    | 2.5    | 64.6    | 71     |
| 2016 | Dinwiddie | RF+IR  | Dwd16RfIR   | Sullivan     | 4   | Virginia    | 6169          | 50      | 1.9    | 67.1    | 71.5   |
| 2016 | Dinwiddie | RF     | Dwd16Rf     | Sullivan     | 1   | Virginia    | 4482          | 27.6    | 4.2    | 42.1    | 59.1   |
| 2016 | Dinwiddie | RF     | Dwd16Rf     | Sullivan     | 2   | Virginia    | 4223          | 37.3    | 3.6    | 50.6    | 61.7   |
| 2016 | Dinwiddie | RF     | Dwd16Rf     | Sullivan     | 3   | Virginia    | 4875          | 40.5    | 3.9    | 56.4    | 65.4   |
| 2016 | Dinwiddie | RF     | Dwd16Rf     | Sullivan     | 4   | Virginia    | 5224          | 43.7    | 4.6    | 53.4    | 65     |
| 2016 | Dinwiddie | RF+IR  | Dwd16RfIR   | TUFRunner297 | 1   | Runner      | 6078          | .       | 6.1    | 64.4    | 76     |
| 2016 | Dinwiddie | RF+IR  | Dwd16RfIR   | TUFRunner297 | 2   | Runner      | 6874          | .       | 8.2    | 63.9    | 76.2   |
| 2016 | Dinwiddie | RF+IR  | Dwd16RfIR   | TUFRunner297 | 3   | Runner      | 6941          | .       | 12.4   | 61.9    | 76.5   |
| 2016 | Dinwiddie | RF+IR  | Dwd16RfIR   | TUFRunner297 | 4   | Runner      | 6751          | .       | 9.8    | 64.5    | 76.6   |
| 2016 | Dinwiddie | RF     | Dwd16Rf     | TUFRunner297 | 1   | Runner      | 4784          | .       | 8.7    | 52.6    | 67.1   |
| 2016 | Dinwiddie | RF     | Dwd16Rf     | TUFRunner297 | 2   | Runner      | 5705          | .       | 3.6    | 63.4    | 71.7   |
| 2016 | Dinwiddie | RF     | Dwd16Rf     | TUFRunner297 | 3   | Runner      | 5490          | .       | 2.5    | 62.7    | 71.6   |
| 2016 | Dinwiddie | RF     | Dwd16Rf     | TUFRunner297 | 4   | Runner      | 5918          | .       | 3.1    | 60.4    | 69.9   |
| 2016 | Dinwiddie | RF+IR  | Dwd16RfIR   | Wynne        | 1   | Virginia    | 4978          | 38.9    | 3.1    | 60.1    | 69.2   |
| 2016 | Dinwiddie | RF+IR  | Dwd16RfIR   | Wynne        | 2   | Virginia    | 5728          | 43.6    | 3      | 59.5    | 69.2   |
| 2016 | Dinwiddie | RF+IR  | Dwd16RfIR   | Wynne        | 3   | Virginia    | 5943          | 47      | 2      | 66.1    | 71.5   |
| 2016 | Dinwiddie | RF+IR  | Dwd16RfIR   | Wynne        | 4   | Virginia    | 5274          | 42.7    | 3.4    | 64.1    | 70.7   |
| 2016 | Dinwiddie | RF     | Dwd16Rf     | Wynne        | 1   | Virginia    | 4979          | 35.1    | 5.2    | 47.2    | 63.8   |
| 2016 | Dinwiddie | RF     | Dwd16Rf     | Wynne        | 2   | Virginia    | 4486          | 38.3    | 4.1    | 53.3    | 63.6   |

|      |             |       |           |              |   |          |      |      |     |      |      |
|------|-------------|-------|-----------|--------------|---|----------|------|------|-----|------|------|
| 2016 | Dinwiddie   | RF    | Dwd16Rf   | Wynne        | 3 | Virginia | 4973 | 33.1 | 4.1 | 47.6 | 60.4 |
| 2016 | Dinwiddie   | RF    | Dwd16Rf   | Wynne        | 4 | Virginia | 4486 | 42   | 3.2 | 51.3 | 63.1 |
| 2017 | Capron      | RF+IR | Cap17RfIR | Bailey       | 1 | Virginia | 5898 | 45   | 7   | 59   | 70   |
| 2017 | Capron      | RF+IR | Cap17RfIR | Bailey       | 2 | Virginia | 6805 | 40   | 4   | 63   | 70   |
| 2017 | Capron      | RF+IR | Cap17RfIR | Bailey       | 3 | Virginia | 6480 | 42   | 8   | 63   | 72   |
| 2017 | Capron      | RF+IR | Cap17RfIR | Bailey       | 4 | Virginia | 5975 | 42   | 7   | 61   | 70   |
| 2017 | Capron      | RF    | Cap17Rf   | Bailey       | 1 | Virginia | 5951 | 46   | 3   | 67   | 72   |
| 2017 | Capron      | RF    | Cap17Rf   | Bailey       | 2 | Virginia | 6416 | 49   | 3   | 69   | 73   |
| 2017 | Capron      | RF    | Cap17Rf   | Bailey       | 3 | Virginia | 6130 | 46   | 4   | 66   | 72   |
| 2017 | Capron      | RF    | Cap17Rf   | Bailey       | 4 | Virginia | 6513 | 43   | 4   | 63   | 71   |
| 2017 | Capron      | RF+IR | Cap17RfIR | FloRun107    | 1 | Runner   | 5253 | .    | 6   | 63   | 74   |
| 2017 | Capron      | RF+IR | Cap17RfIR | FloRun107    | 2 | Runner   | 6073 | .    | 6   | 65   | 75   |
| 2017 | Capron      | RF+IR | Cap17RfIR | FloRun107    | 3 | Runner   | 5816 | .    | 4   | 67   | 76   |
| 2017 | Capron      | RF+IR | Cap17RfIR | FloRun107    | 4 | Runner   | 5989 | .    | 6   | 66   | 76   |
| 2017 | Capron      | RF    | Cap17Rf   | FloRun107    | 1 | Runner   | 5702 | .    | 3   | 70   | 76   |
| 2017 | Capron      | RF    | Cap17Rf   | FloRun107    | 2 | Runner   | 5528 | .    | 4   | 71   | 78   |
| 2017 | Capron      | RF    | Cap17Rf   | FloRun107    | 3 | Runner   | 5414 | .    | 2   | 68   | 75   |
| 2017 | Capron      | RF    | Cap17Rf   | FloRun107    | 4 | Runner   | 5380 | .    | 3   | 69   | 76   |
| 2017 | Capron      | RF+IR | Cap17RfIR | Sullivan     | 1 | Virginia | 5554 | 46   | 5   | 66   | 70   |
| 2017 | Capron      | RF+IR | Cap17RfIR | Sullivan     | 2 | Virginia | 6186 | 42   | 5   | 63   | 71   |
| 2017 | Capron      | RF+IR | Cap17RfIR | Sullivan     | 3 | Virginia | 5563 | 39   | 6   | 62   | 70   |
| 2017 | Capron      | RF+IR | Cap17RfIR | Sullivan     | 4 | Virginia | 6269 | 47   | 5   | 63   | 70   |
| 2017 | Capron      | RF    | Cap17Rf   | Sullivan     | 1 | Virginia | 5228 | 51   | 2   | 66   | 71   |
| 2017 | Capron      | RF    | Cap17Rf   | Sullivan     | 2 | Virginia | 5526 | 45   | 4   | 64   | 71   |
| 2017 | Capron      | RF    | Cap17Rf   | Sullivan     | 3 | Virginia | 5932 | 43   | 4   | 63   | 70   |
| 2017 | Capron      | RF    | Cap17Rf   | Sullivan     | 4 | Virginia | 6211 | 51   | 3   | 66   | 72   |
| 2017 | Capron      | RF+IR | Cap17RfIR | TUFRunner297 | 1 | Runner   | 5902 | .    | 5   | 62   | 74   |
| 2017 | Capron      | RF+IR | Cap17RfIR | TUFRunner297 | 2 | Runner   | 6447 | .    | 4   | 68   | 76   |
| 2017 | Capron      | RF+IR | Cap17RfIR | TUFRunner297 | 3 | Runner   | 6457 | .    | 6   | 66   | 75   |
| 2017 | Capron      | RF+IR | Cap17RfIR | TUFRunner297 | 4 | Runner   | 5510 | .    | 6   | 66   | 76   |
| 2017 | Capron      | RF    | Cap17Rf   | TUFRunner297 | 1 | Runner   | 5617 | .    | 2   | 72   | 76   |
| 2017 | Capron      | RF    | Cap17Rf   | TUFRunner297 | 2 | Runner   | 6008 | .    | 5   | 70   | 77   |
| 2017 | Capron      | RF    | Cap17Rf   | TUFRunner297 | 3 | Runner   | 6499 | .    | 8   | 65   | 76   |
| 2017 | Capron      | RF    | Cap17Rf   | TUFRunner297 | 4 | Runner   | 6234 | .    | 2   | 73   | 77   |
| 2017 | Capron      | RF+IR | Cap17RfIR | Wynne        | 1 | Virginia | 5246 | 44   | 4   | 63   | 69   |
| 2017 | Capron      | RF+IR | Cap17RfIR | Wynne        | 2 | Virginia | 6119 | 43   | 11  | 58   | 70   |
| 2017 | Capron      | RF+IR | Cap17RfIR | Wynne        | 3 | Virginia | 5982 | 38   | 8   | 56   | 69   |
| 2017 | Capron      | RF+IR | Cap17RfIR | Wynne        | 4 | Virginia | 6518 | 46   | 8   | 60   | 70   |
| 2017 | Capron      | RF    | Cap17Rf   | Wynne        | 1 | Virginia | 5332 | 45   | 2   | 64   | 69   |
| 2017 | Capron      | RF    | Cap17Rf   | Wynne        | 2 | Virginia | 6445 | 43   | 5   | 62   | 70   |
| 2017 | Capron      | RF    | Cap17Rf   | Wynne        | 3 | Virginia | 5962 | 43   | 4   | 62   | 70   |
| 2017 | Capron      | RF    | Cap17Rf   | Wynne        | 4 | Virginia | 5524 | 47   | 2   | 66   | 71   |
| 2017 | Rocky Mount | RF+IR | Rkm17RfIR | Bailey       | 1 | Virginia | 5645 | 44   | 2   | 64.5 | 70.2 |

|      |             |       |           |              |   |          |      |    |     |      |      |
|------|-------------|-------|-----------|--------------|---|----------|------|----|-----|------|------|
| 2017 | Rocky Mount | RF+IR | Rkm17RfIR | Bailey       | 2 | Virginia | 4942 | 48 | 2.3 | 66.4 | 71.8 |
| 2017 | Rocky Mount | RF+IR | Rkm17RfIR | Bailey       | 3 | Virginia | 6444 | 50 | 1.9 | 68.5 | 72.7 |
| 2017 | Rocky Mount | RF+IR | Rkm17RfIR | Bailey       | 4 | Virginia | 7159 | 46 | 3.6 | 66.9 | 74.3 |
| 2017 | Rocky Mount | RF    | Rkm17Rf   | Bailey       | 1 | Virginia | 5705 | 52 | 3   | 66   | 72   |
| 2017 | Rocky Mount | RF    | Rkm17Rf   | Bailey       | 2 | Virginia | 6125 | 51 | 4   | 66   | 72   |
| 2017 | Rocky Mount | RF    | Rkm17Rf   | Bailey       | 3 | Virginia | 6012 | 50 | 2   | 65   | 70   |
| 2017 | Rocky Mount | RF    | Rkm17Rf   | Bailey       | 4 | Virginia | 5369 | 47 | 2   | 65   | 69   |
| 2017 | Rocky Mount | RF+IR | Rkm17RfIR | FloRun107    | 1 | Runner   | 5770 | .  | 3   | 58.4 | 70   |
| 2017 | Rocky Mount | RF+IR | Rkm17RfIR | FloRun107    | 2 | Runner   | 5594 | .  | 2.9 | 67.8 | 74.9 |
| 2017 | Rocky Mount | RF+IR | Rkm17RfIR | FloRun107    | 3 | Runner   | 5480 | .  | 3.1 | 64.4 | 73.3 |
| 2017 | Rocky Mount | RF    | Rkm17Rf   | FloRun107    | 1 | Runner   | 4963 | .  | 4   | 65   | 75   |
| 2017 | Rocky Mount | RF    | Rkm17Rf   | FloRun107    | 2 | Runner   | 4859 | .  | 0   | 66   | 73   |
| 2017 | Rocky Mount | RF    | Rkm17Rf   | FloRun107    | 3 | Runner   | 4037 | .  | 7   | 56   | 72   |
| 2017 | Rocky Mount | RF    | Rkm17Rf   | FloRun107    | 4 | Runner   | 4411 | .  | 4   | 59   | 73   |
| 2017 | Rocky Mount | RF+IR | Rkm17RfIR | Sullivan     | 1 | Virginia | 6114 | 41 | 1.6 | 63.1 | 68.8 |
| 2017 | Rocky Mount | RF+IR | Rkm17RfIR | Sullivan     | 2 | Virginia | 5872 | 50 | 1.3 | 63.9 | 69.4 |
| 2017 | Rocky Mount | RF+IR | Rkm17RfIR | Sullivan     | 3 | Virginia | 6845 | 46 | 2.2 | 66.7 | 71.9 |
| 2017 | Rocky Mount | RF+IR | Rkm17RfIR | Sullivan     | 4 | Virginia | 6385 | 49 | 3.3 | 65.6 | 71.8 |
| 2017 | Rocky Mount | RF    | Rkm17Rf   | Sullivan     | 1 | Virginia | 4974 | 43 | 2   | 61   | 67   |
| 2017 | Rocky Mount | RF    | Rkm17Rf   | Sullivan     | 2 | Virginia | 5700 | 50 | 2   | 65   | 69   |
| 2017 | Rocky Mount | RF    | Rkm17Rf   | Sullivan     | 3 | Virginia | 4616 | 48 | 1   | 64   | 68   |
| 2017 | Rocky Mount | RF    | Rkm17Rf   | Sullivan     | 4 | Virginia | 5336 | 48 | 2   | 65   | 70   |
| 2017 | Rocky Mount | RF+IR | Rkm17RfIR | TUFRunner297 | 1 | Runner   | 3590 | .  | 3.7 | 57   | 68.9 |
| 2017 | Rocky Mount | RF+IR | Rkm17RfIR | TUFRunner297 | 2 | Runner   | 5640 | .  | 3.5 | 60.8 | 71   |
| 2017 | Rocky Mount | RF+IR | Rkm17RfIR | TUFRunner297 | 3 | Runner   | 6064 | .  | 4.3 | 67.3 | 75.5 |
| 2017 | Rocky Mount | RF+IR | Rkm17RfIR | TUFRunner297 | 4 | Runner   | 6248 | .  | 2.3 | 66.2 | 73.8 |
| 2017 | Rocky Mount | RF    | Rkm17Rf   | TUFRunner297 | 1 | Runner   | 4838 | .  | 5   | 64   | 74   |
| 2017 | Rocky Mount | RF    | Rkm17Rf   | TUFRunner297 | 2 | Runner   | 5567 | .  | 2   | 64   | 73   |
| 2017 | Rocky Mount | RF    | Rkm17Rf   | TUFRunner297 | 3 | Runner   | 4690 | .  | 5   | 59   | 72   |
| 2017 | Rocky Mount | RF    | Rkm17Rf   | TUFRunner297 | 4 | Runner   | 4749 | .  | 10  | 56   | 72   |
| 2017 | Rocky Mount | RF+IR | Rkm17RfIR | Wynne        | 1 | Virginia | 6118 | 52 | 1.4 | 64.1 | 69.9 |
| 2017 | Rocky Mount | RF+IR | Rkm17RfIR | Wynne        | 2 | Virginia | 6583 | 50 | 3.8 | 63.8 | 70.7 |
| 2017 | Rocky Mount | RF+IR | Rkm17RfIR | Wynne        | 3 | Virginia | 6675 | 55 | 2.4 | 65.6 | 71   |
| 2017 | Rocky Mount | RF+IR | Rkm17RfIR | Wynne        | 4 | Virginia | 6993 | 53 | 1.9 | 66   | 71   |
| 2017 | Rocky Mount | RF    | Rkm17Rf   | Wynne        | 1 | Virginia | 6045 | 47 | 2   | 63   | 68   |
| 2017 | Rocky Mount | RF    | Rkm17Rf   | Wynne        | 2 | Virginia | 5109 | 51 | 2   | 65   | 69   |
| 2017 | Rocky Mount | RF    | Rkm17Rf   | Wynne        | 3 | Virginia | 5530 | 41 | 2   | 59   | 65   |
| 2017 | Rocky Mount | RF    | Rkm17Rf   | Wynne        | 4 | Virginia | 4680 | 46 | 1   | 63   | 68   |
| 2017 | Suffolk     | RF    | Suf17Rf   | Bailey       | 1 | Virginia | 5464 | .  | .   | .    | .    |
| 2017 | Suffolk     | RF    | Suf17Rf   | Bailey       | 2 | Virginia | 8021 | .  | .   | .    | .    |
| 2017 | Suffolk     | RF    | Suf17Rf   | Bailey       | 3 | Virginia | 7603 | .  | .   | .    | .    |
| 2017 | Suffolk     | RF    | Suf17Rf   | Bailey       | 4 | Virginia | 6649 | .  | .   | .    | .    |
| 2017 | Suffolk     | RF    | Suf17Rf   | Bailey       | 1 | Virginia | 5835 | .  | .   | .    | .    |

|      |             |       |           |              |   |          |      |    |   |    |    |
|------|-------------|-------|-----------|--------------|---|----------|------|----|---|----|----|
| 2017 | Suffolk     | RF    | Suf17Rf   | Bailey       | 2 | Virginia | 6672 | .  | . | .  | .  |
| 2017 | Suffolk     | RF    | Suf17Rf   | Bailey       | 3 | Virginia | 6440 | .  | . | .  | .  |
| 2017 | Suffolk     | RF    | Suf17Rf   | Bailey       | 4 | Virginia | 7021 | .  | . | .  | .  |
| 2017 | Suffolk     | RF    | Suf17Rf   | FloRun107    | 1 | Runner   | 5999 | .  | . | .  | .  |
| 2017 | Suffolk     | RF    | Suf17Rf   | FloRun107    | 2 | Runner   | 5789 | .  | . | .  | .  |
| 2017 | Suffolk     | RF    | Suf17Rf   | FloRun107    | 3 | Runner   | 7789 | .  | . | .  | .  |
| 2017 | Suffolk     | RF    | Suf17Rf   | FloRun107    | 4 | Runner   | 6370 | .  | . | .  | .  |
| 2017 | Suffolk     | RF    | Suf17Rf   | FloRun107    | 1 | Runner   | 5394 | .  | . | .  | .  |
| 2017 | Suffolk     | RF    | Suf17Rf   | FloRun107    | 2 | Runner   | 5696 | .  | . | .  | .  |
| 2017 | Suffolk     | RF    | Suf17Rf   | FloRun107    | 3 | Runner   | 5114 | .  | . | .  | .  |
| 2017 | Suffolk     | RF    | Suf17Rf   | FloRun107    | 4 | Runner   | 5882 | .  | . | .  | .  |
| 2017 | Suffolk     | RF    | Suf17Rf   | Sullivan     | 1 | Virginia | 5627 | .  | . | .  | .  |
| 2017 | Suffolk     | RF    | Suf17Rf   | Sullivan     | 2 | Virginia | 6765 | .  | . | .  | .  |
| 2017 | Suffolk     | RF    | Suf17Rf   | Sullivan     | 3 | Virginia | 6835 | .  | . | .  | .  |
| 2017 | Suffolk     | RF    | Suf17Rf   | Sullivan     | 4 | Virginia | 6928 | .  | . | .  | .  |
| 2017 | Suffolk     | RF    | Suf17Rf   | Sullivan     | 1 | Virginia | 5441 | .  | . | .  | .  |
| 2017 | Suffolk     | RF    | Suf17Rf   | Sullivan     | 2 | Virginia | 5348 | .  | . | .  | .  |
| 2017 | Suffolk     | RF    | Suf17Rf   | Sullivan     | 3 | Virginia | 6092 | .  | . | .  | .  |
| 2017 | Suffolk     | RF    | Suf17Rf   | Sullivan     | 4 | Virginia | 6021 | .  | . | .  | .  |
| 2017 | Suffolk     | RF    | Suf17Rf   | TUFRunner297 | 1 | Runner   | 7138 | .  | . | .  | .  |
| 2017 | Suffolk     | RF    | Suf17Rf   | TUFRunner297 | 2 | Runner   | 7300 | .  | . | .  | .  |
| 2017 | Suffolk     | RF    | Suf17Rf   | TUFRunner297 | 3 | Runner   | 7649 | .  | . | .  | .  |
| 2017 | Suffolk     | RF    | Suf17Rf   | TUFRunner297 | 4 | Runner   | 7300 | .  | . | .  | .  |
| 2017 | Suffolk     | RF    | Suf17Rf   | TUFRunner297 | 1 | Runner   | 5789 | .  | . | .  | .  |
| 2017 | Suffolk     | RF    | Suf17Rf   | TUFRunner297 | 2 | Runner   | 6254 | .  | . | .  | .  |
| 2017 | Suffolk     | RF    | Suf17Rf   | TUFRunner297 | 3 | Runner   | 6765 | .  | . | .  | .  |
| 2017 | Suffolk     | RF    | Suf17Rf   | TUFRunner297 | 4 | Runner   | 6161 | .  | . | .  | .  |
| 2017 | Suffolk     | RF    | Suf17Rf   | Wynne        | 1 | Virginia | 7719 | .  | . | .  | .  |
| 2017 | Suffolk     | RF    | Suf17Rf   | Wynne        | 2 | Virginia | 7347 | .  | . | .  | .  |
| 2017 | Suffolk     | RF    | Suf17Rf   | Wynne        | 3 | Virginia | 7672 | .  | . | .  | .  |
| 2017 | Suffolk     | RF    | Suf17Rf   | Wynne        | 4 | Virginia | 7347 | .  | . | .  | .  |
| 2017 | Suffolk     | RF    | Suf17Rf   | Wynne        | 1 | Virginia | 5417 | .  | . | .  | .  |
| 2017 | Suffolk     | RF    | Suf17Rf   | Wynne        | 2 | Virginia | 5835 | .  | . | .  | .  |
| 2017 | Suffolk     | RF    | Suf17Rf   | Wynne        | 3 | Virginia | 5975 | .  | . | .  | .  |
| 2017 | Suffolk     | RF    | Suf17Rf   | Wynne        | 4 | Virginia | 5999 | .  | . | .  | .  |
| 2018 | Rocky Mount | RF+IR | Rkm18RfIR | Bailey       | 1 | Virginia | 5270 | 31 | 3 | 68 | 74 |
| 2018 | Rocky Mount | RF+IR | Rkm18RfIR | Bailey       | 2 | Virginia | 6276 | 35 | 2 | 68 | 73 |
| 2018 | Rocky Mount | RF+IR | Rkm18RfIR | Bailey       | 3 | Virginia | 6473 | 33 | 3 | 67 | 73 |
| 2018 | Rocky Mount | RF+IR | Rkm18RfIR | Bailey       | 4 | Virginia | 7281 | 32 | 2 | 68 | 74 |
| 2018 | Rocky Mount | RF    | Rkm18Rf   | Bailey       | 1 | Virginia | 5997 | 32 | 1 | 71 | 74 |
| 2018 | Rocky Mount | RF    | Rkm18Rf   | Bailey       | 2 | Virginia | 5837 | 27 | 2 | 70 | 75 |
| 2018 | Rocky Mount | RF    | Rkm18Rf   | Bailey       | 3 | Virginia | 5379 | 32 | 0 | 70 | 73 |
| 2018 | Rocky Mount | RF    | Rkm18Rf   | Bailey       | 4 | Virginia | 5863 | 29 | 1 | 68 | 73 |

|      |             |       |           |              |   |          |      |    |   |    |    |
|------|-------------|-------|-----------|--------------|---|----------|------|----|---|----|----|
| 2018 | Rocky Mount | RF+IR | Rkm18RfIR | FloRun107    | 1 | Runner   | 5719 | .  | 3 | 69 | 77 |
| 2018 | Rocky Mount | RF+IR | Rkm18RfIR | FloRun107    | 2 | Runner   | 5777 | .  | 4 | 69 | 78 |
| 2018 | Rocky Mount | RF+IR | Rkm18RfIR | FloRun107    | 3 | Runner   | 5237 | .  | 2 | 68 | 77 |
| 2018 | Rocky Mount | RF+IR | Rkm18RfIR | FloRun107    | 4 | Runner   | 6058 | .  | 3 | 69 | 77 |
| 2018 | Rocky Mount | RF    | Rkm18Rf   | FloRun107    | 1 | Runner   | 5476 | .  | 2 | 71 | 76 |
| 2018 | Rocky Mount | RF    | Rkm18Rf   | FloRun107    | 2 | Runner   | 5507 | .  | 2 | 70 | 77 |
| 2018 | Rocky Mount | RF    | Rkm18Rf   | FloRun107    | 3 | Runner   | 4935 | .  | 2 | 70 | 77 |
| 2018 | Rocky Mount | RF    | Rkm18Rf   | FloRun107    | 4 | Runner   | 5476 | .  | 1 | 71 | 77 |
| 2018 | Rocky Mount | RF+IR | Rkm18RfIR | Sullivan     | 1 | Virginia | 4520 | 33 | 3 | 64 | 72 |
| 2018 | Rocky Mount | RF+IR | Rkm18RfIR | Sullivan     | 2 | Virginia | 5693 | 32 | 2 | 66 | 72 |
| 2018 | Rocky Mount | RF+IR | Rkm18RfIR | Sullivan     | 3 | Virginia | 5730 | 36 | 3 | 66 | 73 |
| 2018 | Rocky Mount | RF+IR | Rkm18RfIR | Sullivan     | 4 | Virginia | 5519 | 35 | 3 | 63 | 72 |
| 2018 | Rocky Mount | RF    | Rkm18Rf   | Sullivan     | 1 | Virginia | 4692 | 37 | 2 | 68 | 73 |
| 2018 | Rocky Mount | RF    | Rkm18Rf   | Sullivan     | 2 | Virginia | 5598 | 40 | 2 | 71 | 75 |
| 2018 | Rocky Mount | RF    | Rkm18Rf   | Sullivan     | 3 | Virginia | 4956 | 36 | 1 | 71 | 74 |
| 2018 | Rocky Mount | RF    | Rkm18Rf   | Sullivan     | 4 | Virginia | 5841 | 45 | 2 | 69 | 74 |
| 2018 | Rocky Mount | RF+IR | Rkm18RfIR | TUFRunner297 | 1 | Runner   | 5363 | .  | 4 | 69 | 78 |
| 2018 | Rocky Mount | RF+IR | Rkm18RfIR | TUFRunner297 | 2 | Runner   | 5474 | .  | 4 | 71 | 78 |
| 2018 | Rocky Mount | RF+IR | Rkm18RfIR | TUFRunner297 | 3 | Runner   | 5798 | .  | 3 | 71 | 78 |
| 2018 | Rocky Mount | RF+IR | Rkm18RfIR | TUFRunner297 | 4 | Runner   | 5907 | .  | 1 | 72 | 78 |
| 2018 | Rocky Mount | RF    | Rkm18Rf   | TUFRunner297 | 1 | Runner   | 5474 | .  | 2 | 74 | 79 |
| 2018 | Rocky Mount | RF    | Rkm18Rf   | TUFRunner297 | 2 | Runner   | 4657 | .  | 1 | 72 | 77 |
| 2018 | Rocky Mount | RF    | Rkm18Rf   | TUFRunner297 | 3 | Runner   | 5800 | .  | 2 | 75 | 79 |
| 2018 | Rocky Mount | RF+IR | Rkm18RfIR | Wynne        | 1 | Virginia | 4199 | 39 | 3 | 64 | 73 |
| 2018 | Rocky Mount | RF+IR | Rkm18RfIR | Wynne        | 2 | Virginia | 5270 | 36 | 1 | 67 | 73 |
| 2018 | Rocky Mount | RF+IR | Rkm18RfIR | Wynne        | 3 | Virginia | 4832 | 34 | 4 | 64 | 73 |
| 2018 | Rocky Mount | RF+IR | Rkm18RfIR | Wynne        | 4 | Virginia | 5108 | 41 | 3 | 64 | 72 |
| 2018 | Rocky Mount | RF    | Rkm18Rf   | Wynne        | 1 | Virginia | 4326 | 40 | 1 | 70 | 73 |
| 2018 | Rocky Mount | RF    | Rkm18Rf   | Wynne        | 2 | Virginia | 4307 | 34 | 1 | 69 | 73 |
| 2018 | Rocky Mount | RF    | Rkm18Rf   | Wynne        | 3 | Virginia | 5379 | 46 | 2 | 69 | 74 |
| 2018 | Rocky Mount | RF    | Rkm18Rf   | Wynne        | 4 | Virginia | 5094 | 36 | 2 | 66 | 73 |
| 2018 | Suffolk     | RF+IR | Suf18RfIR | Bailey       | 1 | Virginia | 5368 | 32 | 3 | 70 | 75 |
| 2018 | Suffolk     | RF+IR | Suf18RfIR | Bailey       | 2 | Virginia | 5073 | 42 | 2 | 70 | 74 |
| 2018 | Suffolk     | RF+IR | Suf18RfIR | Bailey       | 3 | Virginia | 5837 | 44 | 2 | 72 | 76 |
| 2018 | Suffolk     | RF+IR | Suf18RfIR | Bailey       | 4 | Virginia | 5151 | 45 | 2 | 71 | 74 |
| 2018 | Suffolk     | RF    | Suf18Rf   | Bailey       | 1 | Virginia | 6057 | 42 | 2 | 70 | 74 |
| 2018 | Suffolk     | RF    | Suf18Rf   | Bailey       | 2 | Virginia | 6253 | 39 | 1 | 70 | 74 |
| 2018 | Suffolk     | RF    | Suf18Rf   | Bailey       | 3 | Virginia | 5445 | 33 | 1 | 69 | 73 |
| 2018 | Suffolk     | RF    | Suf18Rf   | Bailey       | 4 | Virginia | 6210 | 44 | 1 | 73 | 76 |
| 2018 | Suffolk     | RF+IR | Suf18RfIR | FloRun107    | 1 | Runner   | 5865 | .  | 5 | 68 | 78 |
| 2018 | Suffolk     | RF+IR | Suf18RfIR | FloRun107    | 2 | Runner   | 6343 | .  | 2 | 71 | 77 |
| 2018 | Suffolk     | RF+IR | Suf18RfIR | FloRun107    | 3 | Runner   | 3771 | .  | 3 | 68 | 76 |
| 2018 | Suffolk     | RF+IR | Suf18RfIR | FloRun107    | 4 | Runner   | 5044 | .  | 3 | 69 | 78 |

|      |         |       |           |              |   |          |      |    |   |    |    |
|------|---------|-------|-----------|--------------|---|----------|------|----|---|----|----|
| 2018 | Suffolk | RF    | Suf18Rf   | FloRun107    | 1 | Runner   | 5758 | .  | 2 | 71 | 78 |
| 2018 | Suffolk | RF    | Suf18Rf   | FloRun107    | 2 | Runner   | 5089 | .  | 5 | 65 | 77 |
| 2018 | Suffolk | RF    | Suf18Rf   | FloRun107    | 3 | Runner   | 4482 | .  | 3 | 71 | 78 |
| 2018 | Suffolk | RF    | Suf18Rf   | FloRun107    | 4 | Runner   | 4437 | .  | 1 | 72 | 78 |
| 2018 | Suffolk | RF+IR | Suf18RfIR | Sullivan     | 1 | Virginia | 5911 | 43 | 2 | 69 | 74 |
| 2018 | Suffolk | RF+IR | Suf18RfIR | Sullivan     | 2 | Virginia | 6319 | 50 | 2 | 71 | 75 |
| 2018 | Suffolk | RF+IR | Suf18RfIR | Sullivan     | 3 | Virginia | 6954 | 41 | 3 | 71 | 75 |
| 2018 | Suffolk | RF+IR | Suf18RfIR | Sullivan     | 4 | Virginia | 5248 | 44 | 1 | 70 | 73 |
| 2018 | Suffolk | RF    | Suf18Rf   | Sullivan     | 1 | Virginia | 5575 | 45 | 3 | 67 | 73 |
| 2018 | Suffolk | RF    | Suf18Rf   | Sullivan     | 2 | Virginia | 4632 | .  | 6 | 65 | 74 |
| 2018 | Suffolk | RF    | Suf18Rf   | Sullivan     | 3 | Virginia | 5195 | 42 | 2 | 70 | 74 |
| 2018 | Suffolk | RF    | Suf18Rf   | Sullivan     | 4 | Virginia | 5628 | 42 | 1 | 70 | 73 |
| 2018 | Suffolk | RF+IR | Suf18RfIR | TUFRunner297 | 1 | Runner   | 5649 | .  | 4 | 72 | 78 |
| 2018 | Suffolk | RF+IR | Suf18RfIR | TUFRunner297 | 2 | Runner   | 5933 | .  | 5 | 66 | 77 |
| 2018 | Suffolk | RF+IR | Suf18RfIR | TUFRunner297 | 3 | Runner   | 5433 | .  | 3 | 73 | 79 |
| 2018 | Suffolk | RF+IR | Suf18RfIR | TUFRunner297 | 4 | Runner   | 3896 | .  | 5 | 64 | 76 |
| 2018 | Suffolk | RF    | Suf18Rf   | TUFRunner297 | 1 | Runner   | 5358 | .  | 1 | 72 | 77 |
| 2018 | Suffolk | RF    | Suf18Rf   | TUFRunner297 | 2 | Runner   | 5423 | .  | 3 | 73 | 78 |
| 2018 | Suffolk | RF    | Suf18Rf   | TUFRunner297 | 3 | Runner   | 6122 | .  | 2 | 74 | 78 |
| 2018 | Suffolk | RF    | Suf18Rf   | TUFRunner297 | 4 | Runner   | 5642 | .  | 2 | 72 | 78 |
| 2018 | Suffolk | RF+IR | Suf18RfIR | Wynne        | 1 | Virginia | 4729 | 52 | 1 | 72 | 74 |
| 2018 | Suffolk | RF+IR | Suf18RfIR | Wynne        | 2 | Virginia | 4979 | 37 | 3 | 67 | 73 |
| 2018 | Suffolk | RF+IR | Suf18RfIR | Wynne        | 3 | Virginia | 4459 | 36 | 3 | 66 | 73 |
| 2018 | Suffolk | RF+IR | Suf18RfIR | Wynne        | 4 | Virginia | 5346 | 46 | 1 | 69 | 72 |
| 2018 | Suffolk | RF    | Suf18Rf   | Wynne        | 1 | Virginia | 3629 | 38 | 2 | 68 | 72 |
| 2018 | Suffolk | RF    | Suf18Rf   | Wynne        | 2 | Virginia | 5225 | 43 | 3 | 68 | 73 |
| 2018 | Suffolk | RF    | Suf18Rf   | Wynne        | 3 | Virginia | 4417 | 40 | 3 | 66 | 73 |
| 2018 | Suffolk | RF    | Suf18Rf   | Wynne        | 4 | Virginia | 5707 | 34 | 2 | 74 | 78 |
| 2020 | Suffolk | RF+IR | Suf20RfIR | Bailey       | 1 | Virginia | 5800 | 41 | 2 | 67 | 70 |
| 2020 | Suffolk | RF+IR | Suf20RfIR | Bailey       | 2 | Virginia | 6079 | 47 | 2 | 73 | 75 |
| 2020 | Suffolk | RF+IR | Suf20RfIR | Bailey       | 3 | Virginia | 5137 | 43 | 3 | 70 | 73 |
| 2020 | Suffolk | RF+IR | Suf20RfIR | Bailey       | 4 | Virginia | 5308 | 42 | 3 | 67 | 70 |
| 2020 | Suffolk | RF    | Suf20Rf   | Bailey       | 1 | Virginia | 5223 | 38 | 2 | 67 | 71 |
| 2020 | Suffolk | RF    | Suf20Rf   | Bailey       | 2 | Virginia | 5009 | 44 | 0 | 68 | 71 |
| 2020 | Suffolk | RF    | Suf20Rf   | Bailey       | 3 | Virginia | 4573 | 36 | 3 | 67 | 73 |
| 2020 | Suffolk | RF    | Suf20Rf   | Bailey       | 4 | Virginia | 4890 | 35 | 2 | 68 | 71 |
| 2020 | Suffolk | RF+IR | Suf20RfIR | FloRun107    | 1 | Runner   | 4498 | .  | 4 | 66 | 74 |
| 2020 | Suffolk | RF+IR | Suf20RfIR | FloRun107    | 2 | Runner   | 5437 | .  | 2 | 69 | 75 |
| 2020 | Suffolk | RF+IR | Suf20RfIR | FloRun107    | 3 | Runner   | 4905 | .  | 3 | 70 | 75 |
| 2020 | Suffolk | RF+IR | Suf20RfIR | FloRun107    | 4 | Runner   | 4624 | .  | 3 | 69 | 76 |
| 2020 | Suffolk | RF+IR | Suf20RfIR | FloRun107    | 1 | Runner   | 4537 | .  | 2 | 69 | 75 |
| 2020 | Suffolk | RF+IR | Suf20RfIR | FloRun107    | 2 | Runner   | 4522 | .  | 4 | 66 | 74 |
| 2020 | Suffolk | RF+IR | Suf20RfIR | FloRun107    | 3 | Runner   | 4454 | .  | 2 | 65 | 72 |

|      |         |       |           |              |   |          |      |    |   |    |    |
|------|---------|-------|-----------|--------------|---|----------|------|----|---|----|----|
| 2020 | Suffolk | RF+IR | Suf20RfIR | FloRun107    | 4 | Runner   | 3426 | .  | 2 | 69 | 76 |
| 2020 | Suffolk | RF    | Suf20Rf   | FloRun107    | 1 | Runner   | 3917 | .  | 1 | 69 | 75 |
| 2020 | Suffolk | RF    | Suf20Rf   | FloRun107    | 2 | Runner   | 4816 | .  | 1 | 63 | 72 |
| 2020 | Suffolk | RF    | Suf20Rf   | FloRun107    | 3 | Runner   | 4645 | .  | 2 | 68 | 75 |
| 2020 | Suffolk | RF    | Suf20Rf   | FloRun107    | 4 | Runner   | 4730 | .  | 2 | 71 | 75 |
| 2020 | Suffolk | RF    | Suf20Rf   | FloRun107    | 1 | Runner   | 2967 | .  | 2 | 58 | 71 |
| 2020 | Suffolk | RF    | Suf20Rf   | FloRun107    | 2 | Runner   | 4045 | .  | 1 | 63 | 71 |
| 2020 | Suffolk | RF    | Suf20Rf   | FloRun107    | 3 | Runner   | 3580 | .  | 2 | 65 | 72 |
| 2020 | Suffolk | RF    | Suf20Rf   | FloRun107    | 4 | Runner   | 2840 | .  | 2 | 59 | 71 |
| 2020 | Suffolk | RF+IR | Suf20RfIR | Sullivan     | 1 | Virginia | 6143 | 45 | 3 | 69 | 73 |
| 2020 | Suffolk | RF+IR | Suf20RfIR | Sullivan     | 2 | Virginia | 5128 | 48 | 3 | 70 | 72 |
| 2020 | Suffolk | RF+IR | Suf20RfIR | Sullivan     | 3 | Virginia | 5181 | 38 | 3 | 69 | 73 |
| 2020 | Suffolk | RF+IR | Suf20RfIR | Sullivan     | 4 | Virginia | 5561 | 42 | 2 | 69 | 72 |
| 2020 | Suffolk | RF    | Suf20Rf   | Sullivan     | 1 | Virginia | 4619 | 42 | 1 | 68 | 72 |
| 2020 | Suffolk | RF    | Suf20Rf   | Sullivan     | 2 | Virginia | 4662 | 38 | 2 | 66 | 69 |
| 2020 | Suffolk | RF    | Suf20Rf   | Sullivan     | 3 | Virginia | 4320 | 42 | 1 | 68 | 71 |
| 2020 | Suffolk | RF    | Suf20Rf   | Sullivan     | 4 | Virginia | 4174 | 37 | 1 | 64 | 69 |
| 2020 | Suffolk | RF+IR | Suf20RfIR | TUFRunner297 | 1 | Runner   | 4977 | .  | 3 | 63 | 72 |
| 2020 | Suffolk | RF+IR | Suf20RfIR | TUFRunner297 | 2 | Runner   | 4852 | .  | 2 | 73 | 77 |
| 2020 | Suffolk | RF+IR | Suf20RfIR | TUFRunner297 | 3 | Runner   | 4838 | .  | 4 | 67 | 76 |
| 2020 | Suffolk | RF+IR | Suf20RfIR | TUFRunner297 | 4 | Runner   | 5244 | .  | 3 | 69 | 75 |
| 2020 | Suffolk | RF    | Suf20Rf   | TUFRunner297 | 1 | Runner   | 5308 | .  | 2 | 73 | 76 |
| 2020 | Suffolk | RF    | Suf20Rf   | TUFRunner297 | 2 | Runner   | 5459 | .  | 5 | 67 | 73 |
| 2020 | Suffolk | RF    | Suf20Rf   | TUFRunner297 | 3 | Runner   | 4196 | .  | 2 | 62 | 73 |
| 2020 | Suffolk | RF    | Suf20Rf   | TUFRunner297 | 4 | Runner   | 4452 | .  | 0 | 68 | 74 |
| 2020 | Suffolk | RF+IR | Suf20RfIR | Wynne        | 1 | Virginia | 5972 | 44 | 2 | 69 | 71 |
| 2020 | Suffolk | RF+IR | Suf20RfIR | Wynne        | 2 | Virginia | 4662 | 38 | 3 | 66 | 71 |
| 2020 | Suffolk | RF+IR | Suf20RfIR | Wynne        | 3 | Virginia | 4945 | 42 | 2 | 68 | 71 |
| 2020 | Suffolk | RF+IR | Suf20RfIR | Wynne        | 4 | Virginia | 5021 | 46 | 2 | 68 | 71 |
| 2020 | Suffolk | RF    | Suf20Rf   | Wynne        | 1 | Virginia | 4838 | 42 | 2 | 69 | 71 |
| 2020 | Suffolk | RF    | Suf20Rf   | Wynne        | 2 | Virginia | 4302 | 37 | 1 | 64 | 68 |
| 2020 | Suffolk | RF    | Suf20Rf   | Wynne        | 3 | Virginia | 4473 | 36 | 2 | 62 | 68 |
| 2020 | Suffolk | RF    | Suf20Rf   | Wynne        | 4 | Virginia | 4339 | 37 | 1 | 64 | 68 |
